# Supplementary material
Source: publisher figshare collection journal article supplement (https://tandf.figshare.com/articles/dataset/_/16869267)
Supplement: Supplementary file 2 [file 1]

## Search Strings and Results of full text review

### Search String Google Scholar

(Unilateral OR Femoral OR Transfemoral OR Above?knee OR Knee?Disarticulation OR Through?knee) AND (Amput\* OR Prosth\*) AND ( microprocessor OR MP\*) AND knee AND (low\*?mobility OR PAD OR MFCL?2)

### Search String Embase, PubMed, Cochrane

(unilateral OR femoral OR transfemoral OR above?knee OR knee?disarticulation OR through?knee OR 'knee amputation') AND (amput\* OR prosth\*) AND (microprocessor OR mpk OR mp) AND knee AND ('low mobility' OR mobility OR pad OR mfcl)

### Search String CINAHL complete

Settings: Boolean and, Apply Eq. Subjects, Search within Full Text

(Unilateral OR Femoral OR Transfemoral OR Above\*knee OR Knee\*Disarticulation OR Through\*knee) AND (Amput\* OR Prosth\*) AND (microprocessor OR MPK OR MP) AND knee AND (lower\*mobility OR low\*mobility OR PAD OR MFCL\*2)

1211# Title reviews

409# Abstract reviews

48# Full test reviews

## List of full text reviewed articles

|          | Title / Citation                                                                                                                                                                                                                                                                                                                                                                                                                                              |              |                        |
|----------|---------------------------------------------------------------------------------------------------------------------------------------------------------------------------------------------------------------------------------------------------------------------------------------------------------------------------------------------------------------------------------------------------------------------------------------------------------------|--------------|------------------------|
| <u>1</u> | Prinsen EC, Nederhand MJ, Olsman J, Rietman JS.:<br>Influence of a user-adaptive prosthetic knee on quality of life, balance confidence, and measures of mobility: a randomised cross-over trial<br><i>Clinical Rehabilitation</i> . 2015;29(6):581-591.<br><a href="https://doi.org/10.1177/0269215514552033">DOI:10.1177/0269215514552033</a>                                                                                                               | Not included | No K2 data extractable |
| <u>2</u> | Fuenzalida Squella, SA; Kannenberg, A; Brandão B, Â:<br>Enhancement of a prosthetic knee with a microprocessor-controlled gait phase switch reduces falls and improves balance confidence and gait speed in community ambulators with unilateral transfemoral amputation<br><i>Prosthetics and Orthotics International: April 2018 - Volume 42 - Issue 2</i> - p 228-<br><a href="https://doi.org/10.1177/0309364617716207">DOI: 10.1177/0309364617716207</a> | Not included | K3 / K4 cohort         |
| <u>3</u> | Möller S, Hagberg K, Smulesson K, Ramstrand N,<br>Perceived self-efficacy and specific self-reported outcomes in persons with lower-limb amputation using a non-microprocessor-controlled versus a microprocessor-controlled prosthetic knee<br><i>Disability and Rehabilitation: Assistive Technology</i> 2017<br><a href="https://doi.org/10.1080/17483107.2017.1306590">DOI:10.1080/17483107.2017.1306590</a>                                              | Not included | No K2 data extractable |
| <u>4</u> | Hasenoehrl T, Schmalz T, Windhager R, Domayer S, Dana S, Ambrozy C, Palma S, Crevenna R<br>Safety and function of a prototype microprocessor-controlled knee prosthesis for low active transfemoral amputees switching from a mechanic knee prosthesis: a pilot study<br><i>Disability and Rehabilitation: Assistive Technology</i> 2018                                                                                                                      | Included     |                        |

|           |                                                                                                                                                                                                                                                                                                                                                                                                                    |              |                                            |
|-----------|--------------------------------------------------------------------------------------------------------------------------------------------------------------------------------------------------------------------------------------------------------------------------------------------------------------------------------------------------------------------------------------------------------------------|--------------|--------------------------------------------|
|           | <a href="https://doi.org/10.1080/17483107.2017.1300344">DOI:10.1080/17483107.2017.1300344</a>                                                                                                                                                                                                                                                                                                                      |              |                                            |
| <u>5</u>  | <u>Hahn A, Lang M, Stuckart C.</u><br>Analysis of clinically important factors on the performance of advanced hydraulic, microprocessor-controlled exo-prosthetic knee joints based on 899 trial fittings<br><i>Medicine (Baltimore)</i> 2016<br>DOI: <a href="https://doi.org/10.1097/MD.0000000000005386">10.1097/MD.0000000000005386</a>                                                                        | Included     |                                            |
| <u>6</u>  | <u>Wong CK, Rheinstein J, Stern MA</u><br>Benefits for Adults with Transfemoral Amputations and Peripheral Artery Disease Using Microprocessor Compared with Nonmicroprocessor Prosthetic Knees<br><i>Physical Medicine and Rehabilitation</i> 2015<br>DOI: <a href="https://doi.org/10.1097/PHM.0000000000000265">10.1097/PHM.0000000000000265</a>                                                                | Included     |                                            |
| <u>7</u>  | <u>Wong CK, Chihuri ST, Li G</u><br>Risk of fall-related injury in people with lower limb amputations: a prospective cohort study<br><i>Journal of Rehabilitation Medicine</i> 2016<br>DOI: <a href="https://doi.org/10.2340/16501977-2042">10.2340/16501977-2042</a>                                                                                                                                              | Not Included | No K2 data extractable                     |
| <u>8</u>  | <u>Wurdeman SR, Stevens PM, Campbell JH</u><br>Mobility analysis of amputees (MAAT 3): Matching individuals based on comorbid health reveals improved function for above-knee prosthesis users with microprocessor knee technology<br><i>Assistive technology</i> 2020<br>DOI: <a href="https://doi.org/10.1080/10400435.2018.1530701">10.1080/10400435.2018.1530701</a>                                           | Not Included | No K2 data extractable                     |
| <u>9</u>  | <u>Lansade C, Vicaut E, Paysant J, Ménager D, Cristina MC, Braatz F, Domayer S, Pérennou D, Chiesa G.</u><br>Mobility and satisfaction with a microprocessor-controlled knee in moderately active amputees: A multi-centric randomized crossover trial<br><i>Annals of Physical and Rehabilitation Medicine</i> 2018<br>DOI: <a href="https://doi.org/10.1016/j.rehab.2018.04.003">10.1016/j.rehab.2018.04.003</a> | Included     |                                            |
| <u>10</u> | <u>Prinsen EC, Nederhand MJ, Sveinsdóttir HS, Prins MR, van der Meer F, Koopman HFJM, Rietman JS.</u><br>The influence of a user-adaptive prosthetic knee across varying walking speeds: A randomized cross-over trial.<br><i>Gait &amp; Posture</i> 2017<br>DOI: <a href="https://doi.org/10.1016/j.gaitpost.2016.11.015">10.1016/j.gaitpost.2016.11.015</a>                                                      | Not included | No K2 data extractable                     |
| <u>11</u> | <u>Hafner BJ, Askew RL</u><br>Physical performance and self-report outcomes associated with use of passive, adaptive, and active prosthetic knees in persons with unilateral, transfemoral amputation: Randomized crossover trial.<br><i>Journal of Rehabilitation Research &amp; Development</i> . 2015<br>DOI: <a href="https://doi.org/10.1682/JRRD.2014.09.0210">10.1682/JRRD.2014.09.0210</a>                 | Not Included | K3 / K4 cohort                             |
| <u>12</u> | <u>Thiele J, Westebbe B, Bellmann M, Kraft M.</u><br>Designs and performance of microprocessor-controlled knee joints<br><i>Biomech. Tech</i> 2014<br>DOI: <a href="https://doi.org/10.1515/bmt-2013-0069">10.1515/bmt-2013-0069</a>                                                                                                                                                                               | Not Included | No K2 data extractable, no NMPK comparison |
| <u>13</u> | <u>Mileusnic MP, Hahn A, Reiter S</u><br>Effects of a Novel Microprocessor-Controlled Knee, Kenevo, on the Safety, Mobility, and Satisfaction of Lower-Activity Patients with Transfemoral Amputation<br><i>Journal of Prosthetics and Orthotics</i> 2017<br>DOI: <a href="https://doi.org/10.1097/JPO.0000000000000146">10.1097/JPO.0000000000000146</a>                                                          | Included     |                                            |
| <u>14</u> | <u>Möller, Saffran,</u><br>Functioning in prosthetic users provided with and without a microprocessor-controlled prosthetic knee – relative effects on mobility, self-efficacy and attentional demand<br><i>PhD Thesis</i> 2019, available on Open ACCESS                                                                                                                                                          | Not included | No K2 data extractable                     |

|    |                                                                                                                                                                                                                                                                                                                                                                          |              |                                                         |
|----|--------------------------------------------------------------------------------------------------------------------------------------------------------------------------------------------------------------------------------------------------------------------------------------------------------------------------------------------------------------------------|--------------|---------------------------------------------------------|
|    | <a href="http://www.diva-portal.org/smash/record.jsf?pid=diva2%3A1306249&amp;dswid=-7048">http://www.diva-portal.org/smash/record.jsf?pid=diva2%3A1306249&amp;dswid=-7048</a>                                                                                                                                                                                            |              |                                                         |
| 15 | Highsmith, JM; Kahle, JT.; Wernke, MM; Carey, SL, Miro, RM, Lura, DJ, Sutton, BS.<br>Effects of the genium knee system on functional level, stair ambulation, perceptive and economic outcomes in transfemoral amputees<br><i>Technol Innov. 2016 Sep; 18(2-3): 139–150.</i><br><a href="https://doi.org/10.21300/18.2-3.2016.139">DOI: 10.21300/18.2-3.2016.139</a>     | Not included | K3 / K4 cohort                                          |
| 16 | Hahn A, Lang M.;<br>Effects of Mobility Grade, Age, and Etiology on Functional Benefit and Safety of Subjects Evaluated in More Than 1200 C-Leg Trial Fittings in Germany<br><i>Journal of Prosthetics and Orthotics 2015</i><br><a href="https://doi.org/10.1097/JPO.0000000000000064">DOI: 10.1097/JPO.0000000000000064</a>                                            | Included     |                                                         |
| 17 | Cutti AG, Lettieri E, Del Maestro M, Radaelli G, Luchetti M, Verni G, Masella C.<br>Stratified cost-utility analysis of C-Leg versus mechanical knees: Findings from an Italian sample of transfemoral amputees<br><i>Journal of Prosthetics and Orthotics International 2016</i><br><a href="https://doi.org/10.1177/0309364616637955">DOI:10.1177/0309364616637955</a> | Not included | No K2 data extractable                                  |
| 18 | Highsmith, JM; Kahle JT.; Lura, DJ, Lewandowski, AL, Quillen, WS, Kim, SH.<br>Stair ascent and ramp gait training with the Genium knee<br><i>Technology &amp; Innovation, Number 4, 2013,</i><br><a href="https://doi.org/10.3727/194982413X13844488879267">DOI:10.3727/194982413X13844488879267</a>                                                                     | Not included | K3 / K4 cohort                                          |
| 19 | Möller, S.:<br>Cortical brain activity of transfemoral or knee-disarticulation prosthesis users performing single and dual-task walking activities<br><i>Refers to PhD thesis</i><br><a href="http://www.diva-portal.org/smash/record.jsf?pid=diva2%3A1306114&amp;dswid=-9071">http://www.diva-portal.org/smash/record.jsf?pid=diva2%3A1306114&amp;dswid=-9071</a>       | Not included | No K2 data extractable                                  |
| 20 | Morgan SJ, Hafner BJ, Kelly VE<br>The effects of a concurrent task on walking in persons with transfemoral amputation compared to persons without limb loss<br><i>Journal of Prosthetics and Orthotics International 2016</i><br><a href="https://doi.org/10.1177/0309364615596066">DOI:10.1177/0309364615596066</a>                                                     | Not included | Unrelated, no MPK, no K-level stratification            |
| 21 | Kaufman KR, Bernhardt KA, Symms K.<br>Functional assessment and satisfaction of transfemoral amputees with low mobility (FASTK2): A clinical trial of microprocessor-controlled vs. non-microprocessor-controlled knees<br><i>Clinical Biomechanics 2018</i><br><a href="https://doi.org/10.1016/j.clinbiomech.2018.07.012">DOI:10.1016/j.clinbiomech.2018.07.012</a>    | Included     |                                                         |
| 22 | Thiele J, Gallinger S, Seufert P, Kraft M,<br>THE GAIT SIMULATOR FOR LOWER LIMB EXOPROSTHESES –<br>OVERVIEW AND FIRST MEASUREMENTS FOR COMPARISON OF<br>MICROPROCESSOR CONTROLLED KNEE JOINTS<br><i>Mechanical Engineering Vol. 13, No 3, 2015,</i>                                                                                                                      | Not included | Unrelated, no MPK-NMPK comparison, no K2 stratification |
| 23 | Highsmith MJ, Kahle JT, Shepard NT, Kaufman KR.<br>The effect of the C-leg knee prosthesis on sensory dependency and falls during sensory organization testing<br><i>Technology &amp; Innovation, Number 4, 2013,</i><br><a href="https://doi.org/10.3727/194982413X13844488879212">DOI:10.3727/194982413X13844488879212</a>                                             | Cited        | No K2 data extracable                                   |
| 24 | Mileusnic MP, Rettinger L, Highsmith MJ, Hahn A.<br>Benefits of the Genium microprocessor controlled prosthetic knee on ambulation, mobility, activities of daily living and quality of life: a systematic literature review<br><i>Disability and Rehabilitation: Assistive technology 2019</i>                                                                          | Not included | Review, no new data                                     |

|    |                                                                                                                                                                                                                                                                                                                                                                                                                |              |                                                  |
|----|----------------------------------------------------------------------------------------------------------------------------------------------------------------------------------------------------------------------------------------------------------------------------------------------------------------------------------------------------------------------------------------------------------------|--------------|--------------------------------------------------|
|    | <a href="https://doi.org/10.1080/17483107.2019.1648570">DOI:10.1080/17483107.2019.1648570</a>                                                                                                                                                                                                                                                                                                                  |              |                                                  |
| 25 | <a href="#">Cao W, Yu H, Zhao W, Meng Q, Chen W.</a><br>The comparison of transfemoral amputees using mechanical and microprocessor- controlled prosthetic knee under different walking speeds: A randomized cross-over trial<br><i>Technology and Health Care</i> , 2018<br><a href="https://doi.org/10.3233/THC-171157">DOI: 10.3233/THC-171157</a>                                                          | Not included | No K2 data extractable                           |
| 26 | <a href="#">Morgenroth DC, Roland M, Pruziner AL, Czerniecki JM.</a><br>Transfemoral amputee intact limb loading and compensatory gait mechanics during down slope ambulation and the effect of prosthetic knee mechanism<br><i>Clinical Biomechanics</i> 2018<br><a href="https://doi.org/10.1016/j.clinbiomech.2018.04.007">DOI:10.1016/j.clinbiomech.2018.04.007</a>                                        | Not included | No K2 data extractable                           |
| 27 | <a href="#">Thiele J, Schöllig C, Bellmann M, Kraft M.</a><br>Designs and performance of three new microprocessor-controlled knee joints<br><i>Biomechanical Engineering</i> 2018<br><a href="https://doi.org/10.1515/bmt-2017-0053">DOI:10.1515/bmt-2017-0053</a>                                                                                                                                             | Cited        | No K2 data extractable                           |
| 28 | <a href="#">Morgan SJ.</a><br>Do Microprocessor Knees Improve Outcomes in Early Prosthetic Rehabilitation Compared to Nonmicroprocessor Knees<br>Defence Technical Information Center<br><i>Technical Report</i> , 15 Sep 2017, 14 Sep 2018<br><a href="https://apps.dtic.mil/dtic/tr/fulltext/u2/1063860.pdf">https://apps.dtic.mil/dtic/tr/fulltext/u2/1063860.pdf</a>                                       | Cited        | No data available                                |
| 29 | <a href="#">Bellmann M, Köhler TM, Schmalz T.</a><br>Comparative biomechanical evaluation of two technologically different microprocessor-controlled prosthetic knee joints in safety-relevant daily-life situations<br><i>Biomedical Engineering</i> 2018<br><a href="https://doi.org/10.1515/bmt-2018-0026">DOI:10.1515/bmt-2018-0026</a>                                                                    | Not Included | No K2 data extractable                           |
| 30 | <a href="#">Kuhlmann A, Krüger H, Seidinger S, Hahn A.</a><br>Cost-effectiveness and budget impact of the microprocessor-controlled knee C-Leg in transfemoral amputees with and without diabetes mellitus<br><i>Eur J Health Econ</i> 2020<br><a href="https://doi.org/10.1007/s10198-019-01138-y">DOI: 10.1007/s10198-019-01138-y</a>                                                                        | Cited        | Cost effective study, modelled on existing data. |
| 31 | <a href="#">Carse B, Scott H, Brady L, Colvin J.</a><br>Evaluation of gait outcomes for individuals with established unilateral transfemoral amputation following the provision of microprocessor controlled knees in the context of a clinical service<br><i>Prosthetics and Orthotics International</i> 2021<br><a href="https://doi.org/10.1097/PXR.0000000000000016">DOI: 10.1097/PXR.0000000000000016</a> | Not included | No subgroup analyses available                   |
| 32 | <a href="#">Davie-Smith F, Carse B</a><br>Comparison of patient-reported and functional outcomes following transition from mechanical to microprocessor knee in the low-activity user with a unilateral transfemoral amputation<br><i>Prosthet Orthot Int</i> 2021<br><a href="https://doi.org/10.1097/PXR.0000000000000017">DOI: 10.1097/PXR.0000000000000017</a>                                             | included     |                                                  |
| 33 | <a href="#">Hafner BJ, Smith DG</a><br>Differences in function and safety between Medicare Functional Classification Level-2 and -3 transfemoral amputees and influence of prosthetic knee joint control<br><i>Journal of rehabilitation research and development</i> 2009<br><a href="https://doi.org/10.1682/JRRD.2008.01.0007">DOI:10.1682/JRRD.2008.01.0007</a>                                            | Included     |                                                  |
| 34 | <a href="#">Kahle JT, Highsmith MJ, Hubbard SL</a><br>Comparison of nonmicroprocessor knee mechanism versus C-Leg on Prosthesis Evaluation Questionnaire, stumbles, falls, walking tests, stair descent, and knee preference                                                                                                                                                                                   | Included     |                                                  |

|    |                                                                                                                                                                                                                                                                                                                                                            |              |                                                  |
|----|------------------------------------------------------------------------------------------------------------------------------------------------------------------------------------------------------------------------------------------------------------------------------------------------------------------------------------------------------------|--------------|--------------------------------------------------|
|    | <i>Journal of rehabilitation research and development</i> 2008<br><a href="#">DOI: 10.1682/jrrd.2007.04.0054</a>                                                                                                                                                                                                                                           |              |                                                  |
| 35 | Theeven P, Hemmen B, Rings F, Meys G, Brink P, Smeets R, Seelen H<br>Functional added value of microprocessor-controlled knee joints in daily life performance of Medicare Functional Classification Level-2 amputees<br><i>Journal of Rehabilitation Medicine</i> 2011<br><a href="#">DOI: 10.2340/16501977-0861</a>                                      | Included     |                                                  |
| 36 | Kannenbergh A, Zacharias B, Pröbsting E.<br>Benefits of microprocessor controlled prosthetic knee joints to limited community ambulators: A systematic review.<br><i>PM&amp;R</i> 2014<br><a href="#">DOI: 10.1682/JRRD.2014.05.0118</a>                                                                                                                   | Cited        | Base reference                                   |
| 37 | Kuhlmann A, Hagberg K, Kamrad I, Ramstrand N, Seidinger S, Berg H.,<br>PMD3 A Microprocessor-Controlled Prosthetic Knee Compared to NON-Microprocessor-Controlled Knees in Individuals Aged over 65 in Sweden: A Cost-Effectiveness and Budget-IMPACT Analysis<br><i>Value in Health</i> 2020<br><a href="#">DOI: 10.1016/j.jval.2020.08.1036</a>          | Cited        | Cost effective study, modelled on existing data. |
| 38 | Wetz HH, Hafkemeyer U, Drerup B<br>The influence of the C-leg knee-shin system from the Otto Bock Company in the care of above-knee amputees: A clinical-biomechanical study to define indications<br><i>Orthopade</i> 2005<br><a href="#">DOI: 10.1007/s00132-005-0783-z</a>                                                                              | Not Included | insufficient quantification                      |
| 39 | Burnfield JM, Eberly VJ, Gronley JK, Perry J, Yule WJ, Mulroy SJ.<br>Impact of stance phase microprocessor-controlled knee prosthesis on ramp negotiation and community walking function in K2 level transfemoral amputees.<br><i>Prosthetics and Orthotics International</i> . 2012<br><a href="#">DOI: 10.1177/0309364611431611</a>                      | Included     |                                                  |
| 40 | Eberly VJ, Mulroy SJ, Gronley JK, Perry J, Yule WJ, Burnfield JM.<br>Impact of a stance phase microprocessor-controlled knee prosthesis on level walking in lower functioning individuals with a transfemoral amputation.<br><i>Prosthetics and Orthotics International</i> . 2012<br><a href="#">DOI: 10.1177/0309364613506912.</a>                       | Included     |                                                  |
| 41 | Gerzeli S, Torbica A, Fattore G.<br>Cost utility analysis of knee prosthesis with complete microprocessor control (C-leg) compared with mechanical technology in trans-femoral amputees.<br><i>Eur J Health Econ</i> 2009 10 (1), S. 47–55.<br><a href="#">DOI: 10.1007/s10198-008-0102-9.</a>                                                             | Cited        | No K2 data extracable                            |
| 42 | Hafner BJ, Willingham LL, Buell NC, Allyn KJ, Smith DG.<br>Evaluation of Function, Performance, and Preference as Transfemoral Amputees Transition from Mechanical to Microprocessor Control of the Prosthetic Knee.<br><i>Archives of Physical Medicine and Rehabilitation</i> 2007 88 (2), S. 207–217<br><a href="#">DOI: 10.1016/j.apmr.2006.10.030</a> | Cited        | No K2 data extracable                            |
| 43 | Theeven PJ, Hemmen B, Geers RP, Smeets RJ, Brink PR, Seelen HA.<br>Influence of prosthetic knee joints on perceived performance and everyday life activity level of low-functional persons with a transfemoral amputation or knee disarticulation.<br><i>J Rehabil Med</i> . 2012<br><a href="#">DOI: 10.2340/16501977-0969</a>                            | Included     |                                                  |
| 44 | Jayaraman C, Mummidisetty CK, Albert MV, Lipschutz R, Hoppe-Ludwig S, Mathur G, Jayaraman A.                                                                                                                                                                                                                                                               | Included     |                                                  |

|    |                                                                                                                                                                                                                                                                                                                                                                  |              |                             |
|----|------------------------------------------------------------------------------------------------------------------------------------------------------------------------------------------------------------------------------------------------------------------------------------------------------------------------------------------------------------------|--------------|-----------------------------|
|    | Using a microprocessor knee (C-Leg) with appropriate foot transitioned individuals with dysvascular transfemoral amputations to higher performance levels: a longitudinal randomized clinical trial<br><i>Journal of NeuroEngineering and Rehabilitation</i> 2021<br><a href="https://doi.org/10.1186/s12984-021-00879-3">DOI:10.1186/s12984-021-00879-3</a>     |              |                             |
| 45 | Bellmann M, Köhler TM, Schmalz T.<br>Comparative biomechanical evaluation of two technologically different microprocessor-controlled prosthetic knee joints in safety-relevant daily-life situations.<br><i>Biomedical Engineering / Biomedizinische Technik (Berl)</i> 2019<br><a href="https://doi.org/10.1515/bmt-2018-0026">DOI: 10.1515/bmt-2018-0026</a> . | Not included | No subgroup analysis        |
| 46 | Klute GK, Berge JS, Orendurff MS, Williams RM, Czerniecki JM.<br>Prosthetic intervention effects on activity of lower-extremity amputees.<br><i>Archives of Physical Medicine and Rehabilitation</i> 2006<br><a href="https://doi.org/10.1016/j.apmr.2006.02.007">DOI: 10.1016/j.apmr.2006.02.007</a> .                                                          | Not included | K3 (no subgroups)           |
| 47 | Bell EM, Pruziner AL, Wilken JM, Wolf EJ.<br>Performance of conventional and X2® prosthetic knees during slope descent.<br><i>Clinical biomechanics (Bristol, Avon)</i> 2016<br><a href="https://doi.org/10.1016/j.clinbiomech.2016.01.008">DOI: 10.1016/j.clinbiomech.2016.01.008</a> .                                                                         | Not included | Exo-prosthetics not related |
| 48 | Orendurff MS<br>Literature review of published research investigating microprocessor-controlled prosthetic knees: 2010–2012<br><i>Journal of Prosthetics and Orthotics</i> 2013<br><a href="https://doi.org/10.1097/JPO.0b013e3182a8a922">DOI: 10.1097/JPO.0b013e3182a8a922</a>                                                                                  | Not include  | No subgroup analysis        |
